# Supplementary material for: Ag(I) Biosorption and Green Synthesis of Silver/Silver Chloride Nanoparticles by Rhodotorula mucilaginosa 1S1
Source: MDPI journal article supplement (doi:10.3390/nano13020295), 2023-01-11
Supplement: s1 [file s1]

# Ag(I) Biosorption and Green Synthesis of Silver/Silver Chloride Nanoparticles by *Rhodotorula mucilaginosa* 1S1

Antonio J. Muñoz <sup>1,\*</sup>, Francisco Espínola <sup>1,2</sup>, Encarnación Ruiz <sup>1,2</sup>, Manuel Moya <sup>1,2</sup> and Eulogio Castro <sup>1,2</sup>

<sup>1</sup> Department of Chemical, Environmental and Materials Engineering, Universidad de Jaén, Campus Las Lagunillas, 23071 Jaén, Spain

<sup>2</sup> Centre for Advanced Studies in Earth Sciences, Energy and Environment (CEACTEMA), Universidad de Jaén, Campus Las Lagunillas, 23071 Jaén, Spain

\* Correspondence: amcobo@ujaen.es

**Table S1.** Experimental design used in the study of Ag(I) biosorption with *Rhodotorula mucilaginosa* 1S1 and results obtained.

| A: pH | B: biosorbent dose (g/L) | q <sub>e</sub> : biosorption capacity at equilibrium (mg/g) |
|-------|--------------------------|-------------------------------------------------------------|
| 5.75  | 0.55                     | 46.68                                                       |
| 4.50  | 0.30                     | 69.75                                                       |
| 5.75  | 0.55                     | 46.36                                                       |
| 5.75  | 0.20                     | -                                                           |
| 5.75  | 0.55                     | 46.57                                                       |
| 7.00  | 0.80                     | 50.86                                                       |
| 4.50  | 0.80                     | 39.64                                                       |
| 7.00  | 0.30                     | -                                                           |
| 5.75  | 0.55                     | 47.11                                                       |
| 5.75  | 0.90                     | 58.82                                                       |
| 5.75  | 0.55                     | 46.89                                                       |
| 7.52  | 0.55                     | 56.39                                                       |
| 3.98  | 0.55                     | 29.07                                                       |

**Table S2.** Experimental kinetic data of Ag(I) biosorption with *Rhodotorula mucilaginosa* 1S1.

| 19 °C   |          |       | 27 °C   |          |       | 37 °C   |          |       |
|---------|----------|-------|---------|----------|-------|---------|----------|-------|
| t (min) | q (mg/g) |       | t (min) | q (mg/g) |       | t (min) | q (mg/g) |       |
| 3       | 22.47    | 26.97 | 3       | 30.38    | 35.79 | 3       | 30.25    | 32.50 |
| 7       | 29.30    | 37.13 | 7       | 42.38    | 47.13 | 7       | 43.00    | 48.00 |
| 20      | 45.72    | 49.47 | 20      | 50.46    | 50.04 | 20      | 54.33    | 55.67 |
| 60      | 60.30    | 51.72 | 57      | 52.29    | 52.63 | 60      | 57.50    | 58.42 |
| 178     | 48.05    | 51.05 | 200     | 56.71    | 54.54 | 192     | 59.17    | 61.00 |
| 377     | 56.05    | 52.05 | 380     | 58.79    | 55.29 | 411     | 59.25    | 60.00 |
| 497     | 56.72    | 60.55 | 560     | 80.88    | 77.79 | 541     | 60.00    | 61.75 |
| 620     | 54.47    | 59.38 | 1290    | 52.96    | 52.63 | 1251    | 57.42    | 59.00 |
| 1312    | 56.22    | 55.13 | 1965    | 49.46    | 55.96 | 1471    | 55.17    | 61.83 |
| 1717    | 57.72    | 55.05 | 2745    | 55.04    | 59.54 | 1726    | 60.58    | 61.67 |
| 2057    | 55.13    | 51.38 | 3440    | 57.88    | 58.46 | 1896    | 58.50    | 59.83 |
| 2752    | 55.22    | 50.30 | 4235    | 57.88    | 55.84 | 2704    | 58.75    | 58.17 |

**Table S3.** Equilibrium experimental results on Ag(I) biosorption with *Rhodotorula mucilaginosa* 1S1\*.

| 19 °C                 |                       | 27 °C                 |                       | 37 °C                 |                       |
|-----------------------|-----------------------|-----------------------|-----------------------|-----------------------|-----------------------|
| C <sub>e</sub> (mg/L) | q <sub>e</sub> (mg/g) | C <sub>e</sub> (mg/L) | q <sub>e</sub> (mg/g) | C <sub>e</sub> (mg/L) | q <sub>e</sub> (mg/g) |
| 16.87                 | 40.50                 | 17.50                 | 38.97                 | 16.98                 | 41.77                 |
| 27.69                 | 37.07                 | 28.29                 | 38.13                 | 28.40                 | 41.20                 |
| 37.29                 | 39.27                 | 38.16                 | 38.57                 | 37.84                 | 45.10                 |
| 63.68                 | 49.93                 | 65.00                 | 48.27                 | 66.46                 | 43.20                 |
| 99.44                 | 50.27                 | 100.84                | 54.53                 | 99.88                 | 61.60                 |
| 134.68                | 60.27                 | 135.76                | 70.27                 | 138.80                | 70.27                 |
| 164.50                | 63.67                 | 165.80                | 70.00                 | 168.50                | 68.00                 |
| 260.10                | 114.33                | 269.30                | 85.67                 | 275.20                | 81.67                 |
| 354.40                | 130.67                | 373.90                | 72.67                 | 367.60                | 114.00                |
| 459.00                | 124.33                | 494.00                | 61.67                 | 485.40                | 110.67                |
| 15.76                 | 44.20                 | 16.94                 | 40.83                 | 17.04                 | 41.57                 |
| 27.89                 | 36.40                 | 28.50                 | 37.43                 | 28.45                 | 41.03                 |
| 37.44                 | 38.77                 | 37.02                 | 42.37                 | 37.84                 | 45.10                 |
| 63.02                 | 52.13                 | 64.34                 | 50.47                 | 65.66                 | 45.87                 |
| 99.36                 | 50.53                 | 98.40                 | 62.67                 | 101.64                | 55.73                 |
| 134.52                | 60.80                 | 138.92                | 59.73                 | 138.64                | 70.80                 |
| 155.60                | 93.33                 | 165.70                | 70.33                 | 165.60                | 77.67                 |
| 259.20                | 117.33                | 270.90                | 80.33                 | 276.20                | 78.33                 |
| 360.00                | 112.00                | 368.20                | 91.67                 | 375.60                | 87.33                 |
| 468.30                | 93.33                 | 481.20                | 104.33                | 477.50                | 137.00                |

\*The experimental series was carried out in duplicate.

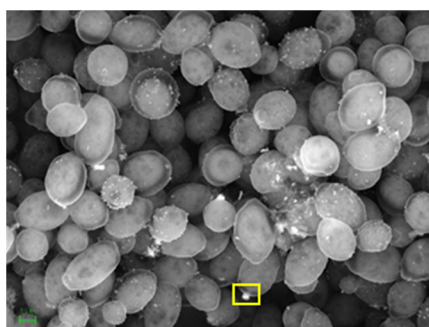

(a)

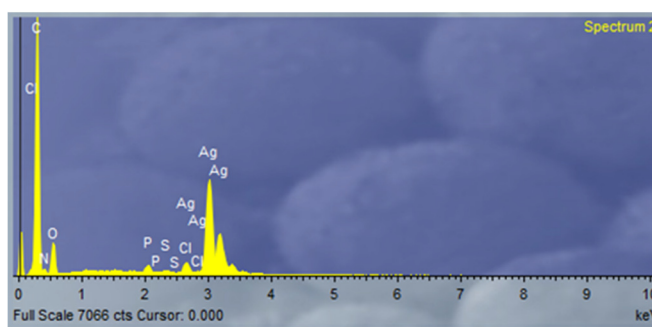

(b)

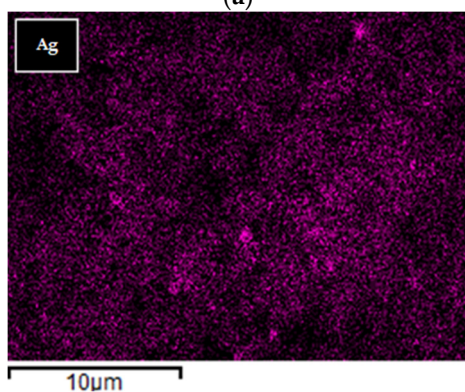

(c)

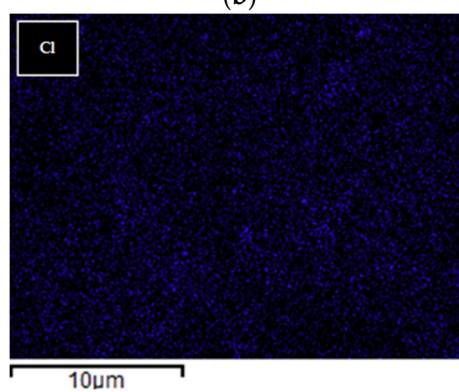

(d)

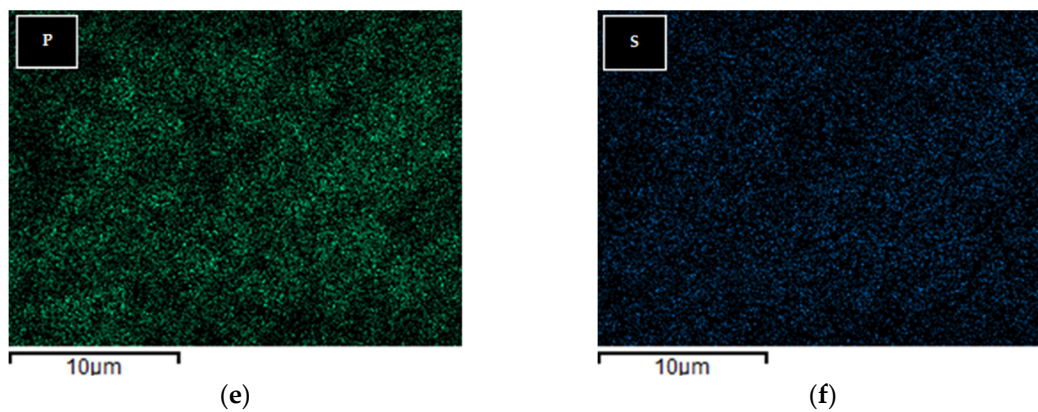

**Figure S1.** (a): SEM image obtained after the Ag(I) biosorption step by *Rhodotorula mucilaginosa* 1S1. (b): EDX spectrum obtained in the marked region on the image (a). (c) to (f): Elementary maps obtained for Ag, Cl, P and S from image (a).

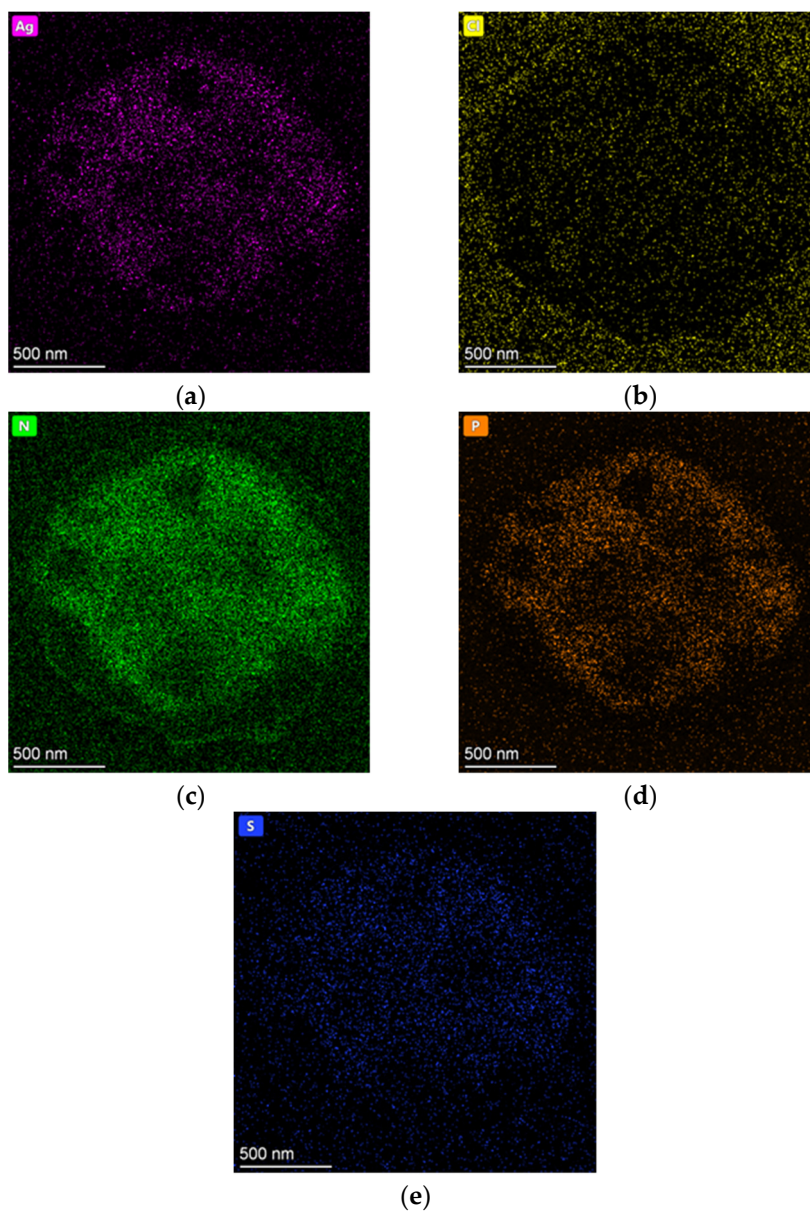

**Figure S2.** TEM-HAADF image of a *Rhodotorula mucilaginosa* 1S1 cell after the Ag(I) biosorption step. (a) to (e): elemental maps for different elements.
